# Supplementary material for: GATA6 Mutations Cause a Broad Phenotypic Spectrum of Diabetes From Pancreatic Agenesis to Adult-Onset Diabetes Without Exocrine Insufficiency
Source: Oxford University Press journal article supplement (doi:10.2337/db12-0885), 2012-12-07
Supplement: db120885supplementarydata.pdf [file db120885supplementarydata.pdf]

## SUPPLEMENTARY DATA

### Members of the International NDM Consortium:

Ilker Akkurt<sup>1</sup>, Holger Blessing<sup>2</sup>, Ondrej Cinek<sup>3</sup>, Ethel Codner<sup>4</sup>, Vaseem Hakeem<sup>5</sup>, Raoul Hennekam<sup>6</sup>, Ina Knerr<sup>7</sup>, Wilma Oostdijk<sup>8</sup>, Radka Savova<sup>9</sup>, Zdenek Sumnik<sup>3</sup>, Susanne Thiele<sup>10</sup>, Tracy Tinklin<sup>11</sup>, Verena Wagner<sup>10</sup>

<sup>1</sup> Oberarzt am Altonaer Kinderkrankenhaus, MVZ am AKK, Bleickenallee 38, 22763 Hamburg, Germany

<sup>2</sup> Facharzt für Kinder- und Jugendmedizin, Diabetologe DDG, Universitätsklinikum Erlangen, Loschgestr. 15, 91054 Erlangen, Germany

<sup>3</sup> Department of Pediatrics, University Hospital Motol, 2nd Faculty of Medicine, Charles University, Prague, Czech Republic

<sup>4</sup> Endocrinología y Diabetes Infantil, Instituto de Investigaciones Materno Infantil (IDIMI), Facultad de Medicina, Universidad de Chile, Santiago, Chile

<sup>5</sup> Department of Pediatrics, Barnet General Hospital, Wellhouse Lane, Barnet, Herts, EN53DJ, UK

<sup>6</sup> Department of Pediatrics H7-236, Academic Medical Center, University of Amsterdam, Meibergdreef 9, 1105AZ Amsterdam, The Netherlands

<sup>7</sup> National Centre for Inherited Metabolic Disorders, Children's University Hospital, Temple Street, Dublin, Ireland

<sup>8</sup> Department of Pediatrics, Leiden University Medical Center, Albinusdreef 2, PO Box 9600, 2300 RC Leiden, The Netherlands

<sup>9</sup> University Children's Hospital, 11 Ivan Geschov Str, Sofia, 1606, Bulgaria

<sup>10</sup> Department of Pediatrics and Adolescent Medicine, University of Luebeck, (Ratzeburger Allee 160, 23568 Lübeck,) Germany

<sup>11</sup> Department of Pediatrics, Royal Derby Hospitals, Uttoxeter Road, Derbyshire, DE22 3NE, UK

SIFT uses sequence homology to predict whether a substitution affects protein function. SIFT scores range from 0 to 1: the amino acid substitution is predicted to be damaging if the score is  $\leq 0.05$ , and tolerated if the score is  $> 0.05$  (1).

We report the qualitative prediction estimated by POLY-PHEN2 using the 10% / 20% FPR for HumVar model (indicated for prediction of pathogenic variants in Mendelian diseases (2)). Mutations with their posterior probability scores associated with estimated false positive rates  $\leq 10\%$  FPR value are predicted to be probably damaging (more confident prediction). Mutations with the posterior probabilities associated with FPR comprised between 10% and 20% are predicted to be possibly damaging and mutations with estimated FPR  $> 20\%$  are classified as benign.

Align GVGD uses Grantham difference to predict the effect of missense variants. Missense changes are classified combining Grantham variation (GV) and Grantham deviation (GD) (3). The AGVGD output classifies amino acid changes from C0 (change unlikely to be pathogenic) to C65 (change most likely to be pathogenic).

SUPPLEMENTARY DATA

**Supplementary Table 1.** *In silico* characterization of the 9 *GATA6* missense mutations identified in patients with diabetes. The effect of each mutation on the *GATA6* protein was predicted by SIFT, Poly-phen2 and Align GVGD.

| <b>Mutation</b> | <b>Protein</b> | <b>SIFT</b>  | <b>Poly-Phen2</b> | <b>AGVGD</b> |
|-----------------|----------------|--------------|-------------------|--------------|
| c.1354A>AG      | p.T452A        | DAMAGING [0] | POSSIBLY DAMAGING | C55          |
| c.1399G>GA      | p.A467T        | DAMAGING [0] | POSSIBLY DAMAGING | C55          |
| c.1366C>CT      | p.R456C        | DAMAGING [0] | PROBABLY DAMAGING | C65          |
| C.1396A>AG      | p.N466D        | DAMAGING [0] | POSSIBLY DAMAGING | C15          |
| c.1417A>AC      | p.K473Q        | DAMAGING [0] | POSSIBLY DAMAGING | C45          |
| c.1367G>GA      | p.R456H        | DAMAGING [0] | PROBABLY DAMAGING | C25          |
| c.1435A>AG      | p.R479G        | DAMAGING [0] | PROBABLY DAMAGING | C65          |
| c.1406G>GA      | p.G469E        | DAMAGING [0] | PROBABLY DAMAGING | C65          |
| c.1339C>CT      | p.C447R        | DAMAGING [0] | PROBABLY DAMAGING | C65          |

SUPPLEMENTARY DATA

**Supplementary Table 2.** *In silico* characterization of the 7 *GATA6* intronic mutations identified in patients with diabetes. The effect of each mutation on splicing was estimated by Human Splicing Finder, NNSPLICE, SpliceSiteFinder-like, MaxEntScan and Gene Splicer.

|                 | Human splicing finder [0-100]                                                                              | NNSPLICE [0-1]                                                                                    | SpliceSiteFinder-like [0-100]                                                     | MaxEntScan [0-12 for donor site, 0-16 for acceptor site]                                                    | GeneSplicer [0-15]                                                              | Comment                                                                                                                                                                      |
|-----------------|------------------------------------------------------------------------------------------------------------|---------------------------------------------------------------------------------------------------|-----------------------------------------------------------------------------------|-------------------------------------------------------------------------------------------------------------|---------------------------------------------------------------------------------|------------------------------------------------------------------------------------------------------------------------------------------------------------------------------|
| 1136-2A>G       | Abolishing conserved splicing acceptor site                                                                | Abolishing conserved splicing acceptor site                                                       | Abolishing conserved splicing acceptor site                                       | Abolishing conserved splicing acceptor site                                                                 | Abolishing conserved splicing acceptor site                                     |                                                                                                                                                                              |
| 1303-10 C>G     | Creating a new splicing acceptor site, stronger than the putative one (79.1 vs 76.7)                       | Creating a new splicing acceptor site, stronger than the putative one (0.4 vs 0.1)                | Creating a new strong splicing acceptor site (84.3), abolishing the putative one  | Creating a new splicing acceptor site, stronger than the putative one (7.1 vs 0.5)                          | Creating a new strong splicing acceptor site (8.8), abolishing the putative one | The mutation is predicted to create a strong cryptic acceptor site at position -9. Inclusion of 9 extra bases causes the insertion of a stop codon after 3 residues.         |
| 1303-1G>T       | Abolishing conserved splicing acceptor site                                                                | Abolishing conserved splicing acceptor site                                                       | Abolishing conserved splicing acceptor site                                       | Abolishing conserved splicing acceptor site                                                                 | Abolishing conserved splicing acceptor site                                     |                                                                                                                                                                              |
| 1429-41_1441del | Abolishing putative splicing acceptor site                                                                 | Abolishing putative splicing acceptor site                                                        | Abolishing putative splicing acceptor site                                        | Abolishing putative splicing acceptor site                                                                  | Abolishing putative splicing acceptor site                                      | The mutation abolishes the acceptor splicing site, possibly causing skipping of exon 5                                                                                       |
| 1429-8T>G       | Creating a new splicing acceptor site, weaker than the putative one (71.3 vs 74.4)                         | No prediction                                                                                     | Creating a new splicing acceptor site, abolishing the putative one                | Creating a new splicing acceptor site, abolishing the putative one                                          | No prediction                                                                   | The mutation is predicted to create a cryptic acceptor site at position -7. Inclusion of 7 extra bases would cause frameshift and insertion of a stop codon after 9 residues |
| 1516+1G>C       | Abolishing conserved splicing donor site                                                                   | Abolishing conserved splicing donor site                                                          | Abolishing conserved splicing donor site                                          | Abolishing conserved splicing donor site                                                                    | Abolishing conserved splicing donor site                                        |                                                                                                                                                                              |
| 1516+4A>G       | Decreasing strength of the donor site (83.1 vs 74.7), creating a cryptic strong acceptor site at +4 (79.4) | Decreasing strength of the donor site (0.9 vs 0.2), creating a cryptic acceptor site at +4 (0.03) | Abolishing the putative donor site, creating a cryptic acceptor site at +4 (74.9) | Decreasing the strength of the donor site (6.1 vs 2.9), creating a cryptic strong acceptor site at +4 (3.5) | No prediction                                                                   | The mutation is predicted to affect the splicing of intron 6                                                                                                                 |

SUPPLEMENTARY DATA

**Supplementary Table 3.** Clinical details of the 14 new cases with *GATA6* mutations reported.

| Proband                    | Mutation            | Protein      | <i>De novo</i>                | Status                      | Cardiac malformations                                                                          | Additional endocrine abnormalities | Hepatobiliary malformations | Neurological abnormalities                       | Gut abnormalities    |
|----------------------------|---------------------|--------------|-------------------------------|-----------------------------|------------------------------------------------------------------------------------------------|------------------------------------|-----------------------------|--------------------------------------------------|----------------------|
| <b><u>ISPAD-204</u></b>    | 1429-8T>TG          |              | <i>De Novo</i>                | Pancreatic agenesis         | Dextrocardia, aorto-pulmonary window, pulmonary hypertension, atrio-ventricular septal defects |                                    |                             | Early cognitive and motor delay                  | Diaphragmatic hernia |
| <b><u>ISPAD-205</u></b>    | 1429-41_1441del     |              | <i>De Novo</i>                | Pancreatic agenesis         | Patent ductus arteriosus                                                                       |                                    |                             |                                                  |                      |
| <b><u>ISPAD-206</u></b>    | c.1435A>AG          | R479G        | <i>De Novo</i>                | Transient Neonatal Diabetes | Transposition of the great arteries, atrio-ventricular septal defects, pulmonary stenosis      |                                    |                             |                                                  |                      |
| <b><u>ISPAD-207</u></b>    | 1136-2A>AG          |              | Inherited                     | Pancreatic agenesis         | Patent ductus arteriosus                                                                       |                                    | Hepatic dysfunction         |                                                  |                      |
| <b><u>ISPAD-207-02</u></b> | 1136-2A>AG          |              | <i>De Novo</i>                | Child-onset diabetes        | Patent ductus arteriosus                                                                       |                                    |                             |                                                  |                      |
| <b><u>ISPAD-208</u></b>    | 1303-1G>TG          |              | Inherited                     | Permanent Neonatal Diabetes | Atrial septal defect, pulmonary stenosis                                                       | Hypothyroidism                     |                             | Mild developmental delay                         |                      |
| <b><u>ISPAD-208-02</u></b> | 1303-1G>TG (mosaic) |              | <i>De Novo</i>                |                             | Patent ductus arteriosus                                                                       |                                    |                             |                                                  |                      |
| <b><u>ISPAD-209</u></b>    | 1036_1042del        | p.T346PfsX44 | Inherited                     | Pancreatic agenesis         | Tetralogy of Fallot                                                                            | Hypothyroidism                     |                             | Mild learning difficulties                       |                      |
| <b><u>ISPAD-209-02</u></b> | 1036_1042del        | p.T346PfsX44 | <i>De Novo</i>                | Adult-onset diabetes        |                                                                                                |                                    |                             |                                                  |                      |
| <b><u>ISPAD-210</u></b>    | c.1406G>GA          | p.G469E      | Inherited                     | Pancreatic agenesis         |                                                                                                | Hypothyroidism                     | Hepatomagaly                | Mild to moderate developmental delay, hemiplegia |                      |
| <b><u>ISPAD-210-02</u></b> | c.1406G>GA          | p.G469E      | No parental samples available | Adult-onset diabetes        |                                                                                                |                                    |                             |                                                  |                      |
| <b><u>ISPAD-211</u></b>    | c.1339C>CT          | p.C447R      | No parental samples available | Permanent Neonatal Diabetes |                                                                                                | Hypothyroidism                     |                             |                                                  |                      |
| <b><u>ISPAD-212</u></b>    | c.969C>CA           | p.Y323X      | Inherited                     | Pancreatic agenesis         | Atrial septal defect, Patent ductus arteriosus                                                 |                                    |                             |                                                  | Diaphragmatic hernia |
| <b><u>ISPAD-212-02</u></b> | c.969C>CA           | p.Y323X      | <i>De Novo</i>                | Adult-onset diabetes        | Ventricular septal defect                                                                      |                                    |                             |                                                  |                      |

## SUPPLEMENTARY DATA

### References

1. Ng PC, Henikoff S. Predicting deleterious amino acid substitutions. *Genome Res.* 2001, 11(5):863-74.
2. Adzhubei IA, Schmidt S, Peshkin L, Ramensky VE, Gerasimova A, Bork P, Kondrashov AS, Sunyaev SR. A method and server for predicting damaging missense mutations. *Nat Methods.* 2010, 7(4):248-9
3. Tavtigian SV, Greenblatt MS, Lesueur F, Byrnes GB; IARC Unclassified Genetic Variants Working Group. In silico analysis of missense substitutions using sequence-alignment based methods. *Hum Mutat.* 2008, 29(11):1327-36
